# Supplementary material for: A Reference List of Phenolic Compounds (Including Stilbenes) in Grapevine (Vitis vinifera L.) Roots, Woods, Canes, Stems, and Leaves
Source: Antioxidants (Basel). 2020 May 8;9(5):398. doi: 10.3390/antiox9050398 (PMC7278806; doi:10.3390/antiox9050398)
Supplement: Supplementary file 1 [file antioxidants-09-00398-s001.xls]

## Sheet: Table S1 Nonstilbenic compounds
											Reference	1		2	3		40		4	5		6		7	8		41		9		10		11	12	13	14	15	16	17		18	19	20		21		22		23
	A Reference List of Phenolic Compounds (Including Stilbenes) in Grapevine (Vitis vinifera L.) Roots, Woods, Canes, Stems, and Leaves										Citation	Hmamouchi M. Es-Safi N. Lahrichi M. Fruchier A. Essassi EM. 1996. Flavones and flavonols in leaves of some Moroccan Vitis vinifera cultivars. American Journal of Enology and Viticulture 47. 186−192.		Harb J. Alseekh S. Tohge T. Fernie RA. 2015. Profiling of primary metabolites and flavonols in leaves of two table grape varieties collected from semiarid and temperate regions. Phytochemistry 117. 444–455.	Lima RMM. Felgueiras ML. Cunha A. Chicau G. Ferreres F. Dias CPA. 2017a. Differential phenolic production in leaves of Vitis vinifera cv. Alvarinho affected with esca disease Plant Physiology and Biochemistry 112. 45–52		Ramalhosa E. Valentão P. Andrade P. Verdial J. Bentoa A. Pereira AJ. 2013. Phenolic composition and antioxidant potential of Vitis vinifera leaves of six varieties harvested in northeast of Portugal. FaBE (Food and Biosystems Engineering) Proceedings 2. 169-176.		Handoussa H. Hanafi R. El-Khatib A. Linscheid M. Mahran L. Ayoub N. 2017. Computer-assisted HPLC method development using DryLab for determination of major phenolic components in Corchorus olitorius and Vitis vinifera by using HPLC-PDA-ESI-TOF- MSn. Research & Reviews: Journal of Botanical Sciences 6. 9—16.	Dresch RR. Dresch KM. Guerreiro FA. Biegelmeyer R. Holzschuh MH. Rambo FD. Henriques TA. 2014. Phenolic compounds from the leaves of Vitis labrusca and Vitis vinifera L. as a source of waste byproducts: Development and validation of LC method and antichemotactic activity. Food Analytical Methods 7. 527–539.		Pantelić MM. Dabić Zagorac ČD. Ćirić ŽI. Pergal VM. Relić JD. Todić RS. Natić MM. 2017. Phenolic profiles. antioxidant activity and minerals in leaves of different grapevine varieties grown in Serbia. Journal of Food Composition and Analysis 62. 76–83.		Aouey B. Samet MA. Fetoui H. Simmonds SJM. Bouaziz M. 2016. Anti-oxidant. anti-inflammatory. analgesic and antipyretic activities of grapevine leaf extract (Vitis vinifera) in mice and identification of its active constituents by LC–MS/MS analyses. Biomedicine & Pharmacotherapy 84. 1088–1098.	Schoedl K. Forneck A. Sulyok M. Schuhmacher R. 2011. Optimization. in-house validation. and application of a Liquid Chromatography_Tandem Mass Spectrometry (LC_MS/MS)-based method for the quantification of selected polyphenolic compounds in leaves of grapevine (Vitis vinifera L.). Journal of Agricultural and Food Chemistry 59. 10787–10794.		Griesser M. Weingart G. Schoedl-Hummel K. Neumann N. Becker M. Varmuza K. Liebner F. Schuhmacher R. Forneck A. 2015. Severe drought stress is affecting selected primary metabolites. polyphenols. and volatile metabolites in grapevine leaves (Vitis vinifera cv. Pinot noir) Plant Physiology and Biochemistry 88. 17–26.		Schoedl K. Schuhmacher R. Forneck A. 2012. Studying the polyphenols of grapevine leaves according to age and insertion level under controlled conditions. Scientia Horticulturae 141. 37–41.		Kocsis M. Abrankó L. Ayaydin F. Csepregi K. Papp N. Teszlák P. Jakab G. 2015. Main leaf polyphenolic components of berry color variant grapevines and their acclimative responses to sunlight exposure. Applied Sciences 5. 1955−1969.		Topalović A. Mikulič-Petkovšek M. Perović N. Trifunović S. Knežević M. 2012. Phenolic composition of the leaf of grapevine cv. cardinal. Agriculture & Forestry 52. 5–15.	Chitarrini G. Zulini L. Masuero D. Vrhovsek U. 2017. Lipid. phenol and carotenoid changes in ‘Bianca’ grapevine leaves after mechanical wounding: a case study. Protoplasma. 254. 2095–2106.	Vezzulli S. Malacarne G. Masuero D. Vecchione A. Dolzani C. Goremykin V. Mehari HZ. Banchi E. Velasco R. Stefanini M. Vrhovsek U. Zulini L. Franceschi P. Moser C. 2019. The Rpv3-3 haplotype and stilbenoid induction mediate downy mildew resistance in a grapevine interspecific population. Frontiers in Plant Science 10. 234.	Tartaglione L. Gambuti A. De Cicco P. Ercolano G. Ianaro A. Taglialatela-Scafati O. Moio L. Forino M. 2018. NMR-based phytochemical analysis of Vitis vinifera cv Falanghina leaves. Characterization of a previously undescribed biflavonoid with antiproliferative activity. Fitoterapia 125. 13–17.	Martín L. Fontaine F . Castañoa JF. Songy A. Roda R . Vallet J . Ferrer-Gallego R. 2019. Specific profile of Tempranillo grapevines related to Esca-leaf symptoms and climate conditions. Plant Physiology and Biochemistry 135. 575–587.	Park H-J. Lim CE. Park C-W. Cha H-C. 2004. Analysis of flavonols extracted from leaves of various grapevine cultivars by HPLC. Horticulture Environment and Biotechnology 45. 138-142.	Schneider E. von der Heydt H. Esperester A. 2008. Evaluation of polyphenol composition in red leaves from different varieties of Vitis vinifera. Planta Medica 74. 565–572.		Cui ZH. Bi WL. Hao XY. Li PM. Duan Y. Walker MA. Xu Y. Wang QC. 2017. Drought stress enhances up-regulation of anthocyanin biosynthesis in grapevine leafroll-associated virus 3-infected in vitro grapevine (Vitis vinifera) leaves. Plant Disease 101. 1606–1615.	Caramanico L. Rustioni L. De Lorenzis G. 2017. Iron deficiency stimulates anthocyanin accumulation in grapevine apical leaves. Plant Physiology and Biochemistry 119. 286–293.	Taware BP. Dhumal NK. Oulkar PD. Patil HS. Banerjee K. 2010. Phenolic alterations in grape leaves. berries and wines due to foliar and cluster powdery mildew infections. International Journal of Pharma and Bio Sciences 1. 1–14.		Fernandes F. Ramalhosa E. Pires P. Verdial J. Valentao P. Andrade P. Bento A. Pereira AJ. 2015. Vitis vinifera leaves towards bioactivity. Industrial Crops and Products 43. 434–440.		Anđelković M. Radovanović B. Anđelković MA. Radovanović V. 2015. Phenolic compounds and bioactivity of healthy and infected grapevine leaf extracts from red varieties Merlot and Vranac (Vitis vinifera L.). Plant Foods for Human Nutrition 70. 317–323.		Farhadi K. Esmaeilzadeh F. Hatami M. Forough M. Molaie R. 2016. Determination of phenolic compounds content and antioxidant activity in skin. pulp. seed. cane and leaf of five native grape cultivars in West Azerbaijan province. Iran. Food Chemistry 199. 847–855
	Piebiep Goufo, Rupesh K. Singh and Isabel Cortez
											Plant part (leaves, stems, canes, trunk, roots)	LEAVES		LEAVES	LEAVES		LEAVES		LEAVES	LEAVES		LEAVES		LEAVES	LEAVES		LEAVES		LEAVES		LEAVES		LEAVES	LEAVES	LEAVES	LEAVES	LEAVES	LEAVES	LEAVES		LEAVES	LEAVES	LEAVES		LEAVES		LEAVES		LEAVES
											Biotic and/or abiotic stresses studied
											Unit (DW=dry weight, FW=fresh weight)	mg/kg DW		Not applicable	mg/kg DW		mg/kg DW		Not applicable	mg/kg DW		mg/kg DW		Not applicable	mg/kg FW		mg/kg FW		mg/kg FW		mg/kg DW		mg/kg FW	mg/kg FW	Not applicable	Not applicable	Not applicable	Not applicable	mg/kg DW		Not applicable	Not applicable	mg/Kg FW		mg/kg DW		mg/kg FW		mg/kg DW
											Detection	LC-DAD, NMR		LC-MS	LC-MS		LC-MS		LC-MS	LC-MS		LC-MS		LC-MS	LC-MS		LC-MS		LC-MS		LC-MS		LC-MS	LC-MS	LC-MS	LC-MS	LC-MS	LC-DAD	LC- DAD		LC-DAD	LC- DAD	LC-DAD		LC-DAD		LC-DAD		LC-DAD
											Levels (minimum, maximum, average values)	minimun value	maximum value		minimun value	maximum value	minimun value	maximum value		minimun value	maximum value	minimun value	maximum value		minimun value	maximum value	minimun value	maximum value	minimun value	maximum value	minimun value	maximum value							minimun value	maximum value			minimun value	maximum value	minimun value	maximum value	minimun value	maximum value	minimun value
	Compound ID	Compound group	Compound name	Other reported names	Chemical formula	Molecular weight (g/mol)	[M − H] − (m/z)	MS-MS -	UV spectrum pattern (MeOH)	Detection mode
							[M–H]– Precursor Ion	Main HR-MS/MS Fragments (m/z)	λmax CH3OH (nm)
		8 Non-phenolic compounds or volatile compounds		NA = not available				Values reported in positive mode	UV unchecked for sh
		11 Stilbenes identified along with other phenolics
	1	hydroxybenzoic acid	Quinic acid		C7H12O6	192.167	191	111, 173, 85, 127	308, 280	MS									✓					✓
		benzenetriol	Pyrogallol	1,2,3-Trihydroxybenzene	C6H6O3	126.111	125	81, 97, 67, 51, 108	266, 237	MS
	2	hydroxybenzoic acid	Gallic acid	3,4,5-Trihydroxybenzoic acid	C7H6O5	170.12	169	125, 124, 79, 51	278, 214	MS, NMR, DAD												3.58	7.8											2.12	✓				0.0642	0.27947			3.6	7.52					0.00091
	3	flavan-3-ol	Gallocatechin	(+)-3,3',4',5,5',7-Hexahydroxyflavan	C15H14O7	306.27	305	179, 221, 219, 165, 261, 125, 137	274, 370	MS												4.84	102											13.77	✓
	4	hydroxybenzoic acid	Protocatechuic acid	3,4-Dihydroxybenzoic acid	C7H6O4	154.121	153	109, 108	297, 258	MS												1.25	10.5
	5	coumarin (hydroxy)	Aesculin	6,7-Dihydroxycoumarin-6-O-glucoside	C15H16O9	340.282	339	133, 177, 150	346, 289	MS												24.6	50.7											1.6
		benzenediol	Catechol	1,2-Dihydroxybenzene	C6H6O2	110.112	109	64, 63, 81, 111	266, 237, 285sh	MS
	6	flavan-3-ol	Procyanidin B1	Epicatechin-(4β→8)-catechin	C30H26O12	578.526	577	425, 407, 289, 451, 287, 245, 451	275, 322	MS, NMR, DAD																							0.57556	25.56	✓				✓	✓							0.38508	0.66407
	7	hydroxybenzoic acid	p-Hydroxybenzoic acid		C7H6O3	138.122	137	93, 60, 79, 108, 118, 137	272, 310sh	MS												15.8	151	✓
	8	hydroxybenzoic acid	Gentisic acid	2,5-Dihydroxybenzoic acid	C7H6O4	154.121	153	109, 81, 42, 108	281, 228, 330sh	MS												0.59	8.85
	9	hydroxybenzoic acid	γ-Resorcylic acid	2,6-Dihydroxybenzoic acid	C7H6O4	154.121	153	109, 136, 154, 110, 52, 80, 137, 39, 155	313, 245	MS																									✓
	10	flavan-3-ol	Procyanidin A1	Procyanidin dimer 1, Epicatechin-(4β→8,2β→7)-catechin	C30H24O12	576.501	575	449, 289, 423, 539, 477, 407, 441	280	MS																							0.71869
	11	dihydrochalcone	Phlorizin	Phloretin 2'-O-glucoside, Dihydronaringenin glucoside	C21H24O10	436.413	435	273, 167, 229, 297	285, 230sh	MS																								2.95	✓
	12	coumarin (methylated)	Fraxin	Fraxetin-8-O-glucoside	C16H18O10	370.31	369	207, 192, 354, 149, 123	332, 308sh	MS																									✓
	13	coumarin (hydroxy)	Aesculetin	6,7-Dihydroxycoumarin	C9H6O4	178.143	177	149, 133, 105, 91, 115, 89, 65	334, 288sh	MS														✓
		hydroxycinnamaldehyde	Sinapaldehyde		C11H12O4	208.213	207	192, 177	338, 300sh	MS
		hydroxycinnamaldehyde	Syringaldehyde		C9H10O4	182.175	181	166, 151, 123	308, 232sh	MS
	14	hydroxycinnamic acid	1-O-Sinapoyl-β-D-glucose	Sinapoyl-glucose	C17H22O10	386.353	385	223, 205, 341, 265, 190, 179, 119, 247	282	MS																							0.1546
	15	flavan-3-ol	Epigallocatechin	(-)-3,3',4',5,5',7-Hexahydroxyflavan	C15H14O7	306.27	305	179, 165, 219, 221, 261, 125, 261, 125	274, 212, 235	MS												1.67	66.3											3.33	✓
	16	hydroxycinnamic acid	1-O-(4-Coumaroyl)-glucose	Coumaroyl-hexose	C15H18O8	326.301	325	163, 145, 119, 187, 265, 205	322	MS																							0.02593
	17	coumarin (hydroxy)	Umbelliferone	7-Hydroxycoumarin	C9H6O3	162.144	161	133, 117, 105, 51, 78	323, 236	MS														✓
		benzaldehyde	Vanillin	4-Hydroxy-3-methoxybenzaldehyde	C8H8O3	152.149	151	136, 123, 81, 109	279, 247sh, 309	MS																								0.11
	18	flavan-3-ol	Procyanidin C1	Epicatechin-(4β→8)-epicatechin-(4β→8)-epicatechin	C45H38O18	866.778	865	695, 407, 577, 287, 713, 739, 575, 425, 289	279	MS, DAD
	19	flavan-3-ol	Procyanidin T2	Epicatechin-(4β→8)-epicatechin-(4β→8)-catechin	C45H38O18	866.778	865	577, 713, 289, 287, 425, 575, 695, 407, 739	280	MS, DAD
	20	hydroxycinnamic acid	1-Caffeoyl-β-D-glucose	Caffeic acid derivative	C15H18O9	342.3	341	179, 161, 143, 149, 131, 135	290, 304sh, 328	MS																								✓
	21	hydroxycinnamic acid	Ferulic acid pentose	Ferulic acid derivative	NA	NA	325	149, 178, 193	326, 275	MS														✓
	22	hydroxycinnamic acid	Caftaric acid isomer		C13H11O9	311.224	311	179, 135, 149	325, 286	MS																					✓	✓
	23	flavan-3-ol	Catechin	(+)-3,3',4',5,7-Pentahydroxyflavan	C15H14O6	290.271	289	245, 203, 179, 205, 227, 109, 123, 165, 125, 151	275, 222	MS, NMR, DAD												1.25	60.5		1.22	19.31	1.22	19.31	2.1	76.58			0.16986	3.72	✓				0.32319	0.978			0.02	0.06			1.6909	2.54123	0.03625
	24	hydroxycinnamic acid	Caftaric acid	2-Caffeoyl tartaric acid	C13H12O9	312.23	311	179, 135, 149, 267, 161, 237	326, 298sh, 243	MS, NMR, DAD					5378.43	8515.67	5378.43	8515.67	✓	✓	✓			✓	21.96	354.82	21.96	354.82	12.46	7432.08	1940.75	8460.31	252.07	1251.32	✓	✓	✓		✓	✓					1880.65	14052.6	5122.94	5788.44
	25	flavan-3-ol	Procyanidin B3	Procyanidin dimer 2, Catechin-(4α→8)-catechin	C30H26O12	578.526	577	425, 407, 289, 151, 559, 445	270, 330	MS, NMR, DAD																							0.73607	2.41	✓
	26	flavan-3-ol	Procyanidin B4	Procyanidin dimer 3, Catechin-(4α→8)-epicatechin	C30H26O12	578.526	577	425, 407, 289	280, 240	MS, DAD																							0.60914	2.38			✓
	27	hydroxycinnamic acid	Coutaric acid	Coumaroyltartaric acid	C13H12O8	296.231	295	163, 149, 119	316, 234, 300sh	MS, DAD					507.31	951.16	507.31	951.16						✓							✓	✓	4.54	178.6	✓				✓	✓					211.89	1491.02	575.61	979.45
	28	hydroxycinnamic acid	Chlorogenic acid	3-Caffeoylquinic acid	C16H18O9	354.311	353	191, 179, 135, 161, 335, 172, 284	328, 244, 303sh	MS, DAD												0.14	11.5																0.04226	0.71859			0.01	0.25			0.54732	0.70249
	29	flavan-3-ol	Procyanidin B2	Epicatechin (4β→8)-(−)-epicatechin	C30H26O12	‎578.526	577	425, 407, 289, 451, 287, 245, 125	280, 240, 370	MS, NMR, DAD																							0.35092	5.69	✓				0.40429	1.20174
	30	hydroxybenzoic acid	Vanillic acid	4-Hydroxy-3-methoxybenzoic acid	C8H8O4	168.149	167	123, 152, 108, 91	292, 260	MS, NMR, DAD																								0.04					0.22237	0.542			0.01	0.13
	31	hydroxycinnamic acid	Chicoric acid	2,3-Dicaffeoyltartaric acid	C22H18O12	474.374	473	311, 293, 179, 149, 135, 219	328, 305sh, 279	MS
	32	hydroxycinnamic acid	Fertaric acid	Feruloyltartaric acid	C14H14O9	326.259	325	193, 175, 149, 281, 134	314, 279	MS																								85.48	✓
	33	anthocyanin	Delphinidin-3-O-glucoside	Myrtillin	C21H21O12+	465.387	463	301, 300, 271, 125	526, 361, 277, 402sh	DAD																													✓	✓	✓	✓
	34	anthocyanin	Cyanidin-3-O-glucoside	Kuromanin, Chrysanthemin	C21H21O11+	449.388	447	284, 211, 285, 255, 147, 227	516, 262, 301sh	MS, DAD									✓	0.15	6.4				0.11	1.26	0.11	1.26	✓	✓									✓	✓	✓	✓	0.01	0.02
	35	hydroxycinnamic acid	Caffeic acid	3,4-Dihydroxy-cinnamic acid	C9H8O4	180.159	179	135, 134, 96	324, 299sh, 240	MS, NMR, DAD		✓	✓									2.72	19.6		0.05	0.1	0.05	0.1	✓	✓				0.96	✓				0.16239	0.41223			0.04	0.18			0.25362	0.51114	0.00332
		benzaldehyde	Acetovanillone	Apocynin	C9H10O3	166.176	165	150, 121, 123	275, 303	MS
	36	hydroxybenzoic acid	Syringic acid	4-Hydroxy-3,5-dimethoxybenzoic acid	C9H10O5	198.174	197	182, 153, 167, 138	276	MS, NMR, DAD																																	0.01	0.07
	37	flavan-3-ol	Epigallocatechin gallate	(2R.3R)-3′,4′,5,5′,7-Pentahydroxyflavan-3-yl gallate	C22H18O11	458.375	457	305, 219, 261, 221, 359, 169, 305, 289, 271, 125, 331	274, 238	MS, DAD												3.51	43.81											5.99	✓												0.0407	0.08829
	38	flavan-3-ol	Prodelphinidin A-type	Epigallocatechin-epicatechin dimer	C30H26O13	594.527	593	425, 441, 573, 423, 407, 289, 531, 273, 339, 245, 177, 161, 125	276, 228, 320	MS
	39	flavan-3-ol	Procyanidin dimer gallate	Epicatechin–epicatechin gallate	NA	NA	729	577, 407, 559, 451, 711, 289, 593, 437, 425	280	MS, DAD
	40	flavan-3-ol	Epicatechin	(-)-3,3',4',5,7-Pentahydroxyflavan	C15H14O6	290.271	289	245, 203, 109, 179, 205, 123, 125, 151	277, 226	MS, NMR, DAD												0.53	9.87		0.54	13.32	0.54	13.32	0.14	15.02			0.26382	1.48	✓				0.05204	0.50233			0.01	0.02			0.72637	1.20257	0.02243
	41	flavanone	Taxifolin	Flavanol dimer, Dihydroquercetin, Catechin hydrate	C15H12O7	304.254	303	285, 125, 177, 275, 151, 259, 217	290, 326sh	MS																								0.37
	42	flavan-3-ol	Gallocatechin gallate		C22H18O11	458.375	457	169, 161, 359, 331, 169, 305, 193	276, 240	MS												20.1	78.7
	43	hydroxycinnamic acid	p-Coumaric acid	4-Hydroxycinnamic acid	C9H8O3	164.16	163	119, 104, 93	310, 225, 211, 310sh	MS, NMR, DAD												0.54	8.17		0.01	0.02	0.01	0.02	✓	✓									0.04194	0.22045			0.01	0.14
	44	anthocyanin	Petunidin-3-O-glucoside		C22H23O12+	479.414	477	314, 315, 299, 300	526, 344sh, 277	DAD																													✓	✓	✓	✓
	45	anthocyanin	Peonidin-3-O-glucoside		C22H23O11+	463.415	461	299, 298, 284, 255, 227, 211	517, 280, 330sh, 421sh	MS, DAD										0.15	0.6																		✓	✓	✓	✓	0.01	0.02
	46	hydroxycinnamic acid	Ferulic acid	3-Methoxy-4-hydroxycinnamic acid	C10H10O4	194.186	193	134, 149, 178, 116	323, 289, 238sh	MS, NMR, DAD												7.1	89.8		0.12	0.21	0.12	0.21	✓	✓				0.04					0.00844	0.04953							0.92001	1.1609
	47	flavan-3-ol	Epicatechin gallate	3,3',4',5,7-Pentahydroxyflavane 3-Gallate	C22H18O10	442.376	441	289, 245, 205, 169, 125, 331, 271, 179	278, 240	MS, NMR, DAD															0.23	1.97	0.23	1.97	0.08	8.45				2.69	✓								0.01	0.02
	48	hydroxycinnamic acid	Sinapic acid	3,5-Dimethoxy-4-hydroxycinnamic acid	C11H12O5	224.212	223	164, 149, 208, 164, 193, 179	318, 238	MS																								0.55
	49	flavonol (pentahydroxy)	Myricetin-3-O-galactoside		C21H20O13	480.378	479	317, 316, 178, 271	360, 265	MS, DAD				✓																	✓	✓							✓	✓
	50	hydroxybenzoic acid	Ellagic acid		C14H6O8	302.194	301	284, 300, 257, 229, 184	367, 256, 301sh	MS												0.0574	0.77
	51	flavonol (pentahydroxy)	Myricetin-3-O-glucuronide		C21H18O14	494.361	493	317	353, 300sh, 261	MS, DAD				✓																									✓	✓
	52	anthocyanin	Malvidin-3-O-glucoside	Oenin	C23H25O12+	493.441	491	329, 314, 299	528, 348sh, 288	MS, DAD																													✓	✓	✓	✓	0.01	0.06
		hydroxycinnamaldehyde	Coniferaldehyde		C10H10O3	178.187	177	162, 149, 134, 177, 120	322, 288sh	MS
	53	flavonol (pentahydroxy)	Myricetin-3-O-glucoside		C21H20O13	480.378	479	317, 316, 169, 271, 303, 227, 179, 151	362, 298sh, 260	MS, DAD				✓	153.51	364.51	153.51	364.51													✓	✓													61.41	850.12	0	91.01
		stilbenoid	Astringin	Piceatannol-3-O-glucoside	C20H22O9	406.387	405	243, 225, 322, 201, 159	331, 305	MS																								0.08	✓
	54	flavonol (tetrahydroxy)	Quercetin-3-O-rutinoside	Rutin	C27H30O16	610.521	609	301, 300, 271, 255, 179, 343, 151	353, 256, 294sh	MS, NMR, DAD				✓					✓	8.55	19.62	74.8	450								130	1650.01	731.59	6.52	✓				✓	✓							4.83425	10.7133	1.3029
		stilbenoid	trans-Piceid	trans-Resveratrol-3-O-β-glucoside	C20H22O8	390.388	389	227, 185, 209, 371, 143, 251	318, 306, 229	MS, DAD																								1.72	✓												0.10625	0.2211
	55	flavanone	Taxifolin-O-pentoside		C20H20O11	436.371	435	303, 285, 399, 151, 241, 217, 175	274, 317	MS
	56	flavanone	Taxifolin-3-O-glucoside		C21H22O12	466.395	465	285, 303, 151, 339, 177, 259, 447	290	MS
	57	flavanone	Taxifolin-3-O-rhamnoside	Astilbin	C21H22O11	450.396	449	303, 285, 151, 323, 431	292, 235	MS
	58	flavonol (tetrahydroxy)	Quercetin-3-O-galactoside	Hyperoside	C21H20O12	464.379	463	301, 300, 179, 273, 257, 151	362, 256, 301sh	MS, NMR, DAD				✓	4822.02	22405.2	4822.02	22405.2		4.92	32.37										130.05	1810.36	343.08	21.72					✓	✓					10129.9	28831.1	323.4	603.74
	59	anthocyanin	Petunidin-3-(6-O-acetyl)glucoside		C24H25O13+	521.451	519	315, 302, 274, 149	528, 270, 350sh	DAD																															✓
	60	flavonol (tetrahydroxy)	Quercetin-3-O-glucoside	Isoquercetin	C21H20O12	464.379	463	301, 300, 271, 161, 179, 255, 151	358, 256, 300sh	MS, NMR, DAD		2200.43	6201.32	✓	11235.7	20567.4	11235.7	20567.4		441.09	1161.65			✓	5.09	65.16	5.09	65.16	27.65	171.59	730.03	7350.03	1176.96	32.76	✓	✓	✓	✓	1920.3	11200.9					13374.5	46528.6	8785.04	22610.1
	61	flavan-3-ol	Catechin gallate		C22H18O10	442.376	441	289, 245, 205, 331, 169, 125, 425, 271, 395, 169, 193, 405	278	MS																											✓
	62	anthocyanin	Peonidin-3-(6-O-acetyl)glucoside		C24H25O12+	505.452	504	301, 286, 230, 258, 268	522, 280	DAD																													✓	✓
	63	flavonol (tetrahydroxy)	Quercetin-3-O-glucuronide	Miquelianin	C21H18O13	478.362	477	301, 179, 151, 283, 459, 431, 501	356, 254, 300sh	MS, NMR, DAD		2500.15	8507.44	✓					✓	2041.48	6788.44			✓	✓	✓	✓	✓	✓	✓	6190.1	18520.4	3794.82	868.63	✓	✓	✓		3780.62	22050.8
	64	flavone	Apigenin-7-O-glucoside	Apigetrin	C21H20O10	432.381	431	269, 283, 311, 413, 231, 225, 201, 197, 149	335, 269, 253	MS, NMR, DAD		0.0942	1.60321
	65	flavonol	Myricetin-3-O-rhamnoside	Myricitrin	C21H20O12	464.379	463	317, 316, 271, 300, 179, 287, 151	372, 302sh, 248	MS				✓
	66	flavone	Luteolin-7-O-glucoside	Cynaroside	C21H20O11	448.38	447	285, 226, 257, 217, 241, 198	349, 254sh, 205	MS, NMR, DAD		0.01623	1.90006						✓															0.11	✓												0.24304	0.71067
	67	anthocyanin	Malvidin-3-(6-O-acetyl)glucoside		C25H27O13+	535.478	533	329, 315	522, 344, 278	DAD																													✓	✓	✓
		stilbenoid	trans-Piceatannol	trans-3-Hydroxyresveratol	C14H12O4	244.246	243	225, 173, 201, 159, 181, 132, 199, 143	325, 290, 306sh	MS, DAD																									✓								0.01	0.03
		stilbenoid	trans-Resveratrol	trans-3,4',5-Trihydroxystilbene	C14H12O3	228.247	227	185, 143, 159, 157, 212, 205	306, 319sh, 228	MS, DAD												0	84.4	✓	✓	✓	✓	✓	✓	✓				0.16	✓								0.01	0.26			0.0603	0.07206	0.00126
		stilbenoid	cis-Piceid	cis-Resveratrol-3-O-β-glucoside	C20H22O8	390.388	389	227, 269, 241, 185, 209, 371, 143	284, 230	MS																								5.98	✓
	68	flavonol	Myricetin	3,3′,4′,5,5′,7-Hexahydroxyflavone	C15H10O8	318.237	317	151, 179, 137, 287, 271, 109, 192	372, 253, 303sh, 207	MS, NMR, DAD		12.1	193277		✓	✓	✓	✓																11.39									1	6
	69	flavonol	Quercetin-3-O-rhamnoside	Quercitrin	C21H20O11	448.38	447	301, 300, 179, 151, 271, 257	354, 258, 307sh	MS, NMR, DAD		1210.53	4206.67	✓
		stilbenoid	cis-Resveratrol-3-O-glucoside		C20H23O8	391.391	389	227	319, 306sh	MS															3.91	22	3.91	22	0.01	232.63
		stilbenoid	cis-Resveratrol	cis-3,4',5-Trihydroxystilbene	C14H12O3	228.247	227	185, 143, 159, 157, 212, 205	285, 232	MS, DAD																									✓												0	0.26731
	70	flavonol	Kaempferol-3-O-galactoside	Trifolin	C21H20O11	448.38	447	285, 255, 227, 327	361, 260	MS				✓																	✓	✓	0.05678				✓
	71	flavonol	Kaempferol-3-O-rutinoside	Nicotiflorin	C27H30O15	594.522	593	285, 257, 151, 447, 199, 241, 93	354, 274	MS, DAD				✓										✓							70.3	730.01	0.1236	0.94			✓		✓	✓
	72	anthocyanin	Cyanidin-3-(6-O-coumaroyl)glucoside		C30H27O13+	595.533	593	287, 259, 231, 213, 259	524, 314, 284, 449sh	DAD																															✓
	73	flavonol	Kaempferol-3-O-glucuronide		C21H18O12	462.363	461	285, 267, 443, 417, 257, 229	348, 265	MS, DAD				✓										✓							240.7	1698.41		47.92	✓	✓	✓		✓	✓
	74	flavonol	Quercetin-3-(6-O-acetyl)glucoside		C23H22O13	506.416	505	301, 300, 463, 271, 255	354, 256, 267sh, 298sh	MS														✓
	75	flavonol	Quercetin-3-(3-O-arabinosyl)glucoside		C26H28O16	596.493	595	301, 517, 151, 300, 463, 179, 445, 271, 255	354, 260, 231	MS				✓																				0.31
	76	flavonol	Quercetin-3-(7-O-glucosyl)glucuronide		C27H28O18	640.503	639	477, 301, 179, 151	361, 300, 268, 256	DAD																												✓
	77	flavonol	Quercetin-3-O-arabinose	Quercetin-O-pentoside	C20H18O11	434.35	433	301, 179, 151, 300, 283	358, 311	MS
	78	flavonol	Quercetin-3-(3-O-rhamnosyl)glucoside-7-O-rhamnoside		C33H40O21	772.662	771	609, 301	355, 259, 299sh, 204	NMR, DAD		1.32354	4.20689
	79	flavonol	Kaempferol-3-O-glucoside	Astragalin	C21H20O11	448.38	447	285, 255, 151, 227, 327, 243	348, 263, 297sh	MS, DAD				✓	1642.62	4773.59	1642.62	4773.59						✓	0.14	6.58	0.14	6.58	2.56	33.41	114	1762.7	1837	2.69		✓	✓	✓	300.11	1750.65					2143.93	6203.85	1484.88	2660.3
	80	anthocyanin	Petunidin-3-(6-O-coumaroyl)glucoside		C31H29O14+	625.553	624	317, 302, 274, 218, 228, 246	534, 282, 313	DAD																															✓
	81	anthocyanin	Peonidin-3-(6-O-coumaroyl)glucoside		C31H29O13+	609.554	608	301, 286, 230, 258, 268	522, 312	MS, DAD				✓																									✓	✓	✓
	82	flavonol	Quercetin	3,3',4',5,7-Pentahydroxyflavone	C15H10O7	302.239	301	151, 179, 273, 193, 257, 229	372, 255, 202sh, 300sh	MS, NMR, DAD		1.65004	4.00078						✓			5.65	52	✓	0.25	1.48	0.25	1.48	4.26	52.17													6.82	9.12			0.30817	1.70758	0.1261
	83	cinnamic acid	Cinnamic acid	Phenylacrylic acid	C9H8O2	148.161	147	103, 77, 87, 129	276, 215, 203	DAD																													0.16564	0.5134
	84	flavonol	Kaempferol	3,4′,5,7-tetrahydroxyflavone	C15H10O6	286.239	285	187, 117, 211, 127, 257, 151, 169, 241	369, 258, 390	MS, NMR, DAD		0.0645	2.11134									1.13	6.77		✓	✓	✓	✓	0.01	0.09							✓						0.01	0.04
	85	anthocyanin	Malvidin-3-(6-O-coumaroyl)glucoside		C32H31O14+	639.586	637	329, 299, 281	534, 318	DAD																													✓	✓	✓
	86	anthocyanin	Malvidin-3-(6-O-caffeoyl)glucoside		C32H31O15+	655.581	655	331, 299, 637, 315, 475	532, 324, 284	MS
	87	anthocyanin	Malvidin-3-O-rutinoside		C29H35O16+	639.583	637	331	526, 288	MS
	88	flavanone	Hesperetin	3',5,7-Trihydroxy-4'-methoxyflavanone	C16H14O6	302.282	301	258, 143, 157, 137, 286	284, 324sh, 221	MS									✓
	89	flavonol	Kaempferol-3-O-xyloside	Kaempferol-O-pentoside	C20H18O10	418.354	417	285, 255, 227	350	MS				✓																			0.22883
	90	flavonol	Kaempferol-3-O-rhamnoside	Afzelin	C21H20O10	432.381	431	285	351, 264, 202, 294sh	MS				✓
	91	flavonol	Dihydrokaempferol-3-O-rhamnoside	Engeletin	C21H22O10	434.397	433	269, 287, 259, 180, 151, 368	286, 230	MS
	92	flavonol	Isorhamnetin-3-O-galactoside	Cacticin	C22H22O12	478.406	477	315,.314 271, 300, 357	366, 289, 259	MS				✓																	✓	✓
	93	flavonol	Isorhamnetin-3-O-glucoside	Isorhamnetin hexoside isomer 1	C22H22O12	478.406	477	315, 314, 285, 357, 271	354, 265sh	MS, DAD				✓																	✓	✓		1.48				✓
	94	flavonol	Quercetin-3-(6-O-rhamnosyl)galactoside		C27H30O16	610.517	609	301, 541, 463, 300, 271, 255, 179, 447, 151	356, 256, 300	NMR, DAD		0.0242	4.01606
	95	flavanone	Eriodictyol-7-O-glucoside	Miscanthoside	C21H22O11	450.396	449	287, 269, 151, 135, 259, 225, 209, 431	281, 327	MS														✓
	96	flavonol	Isorhamnetin-3-O-arabinose	Isorhamnetin-O-pentoside	C21H20O11	448.381	447	315, 314, 271, 243	345, 258	MS				✓
	97	flavonol	Isorhamnetin-3-O-glucuronide	Isorhamnetin hexoside isomer 2	C22H20O13	492.389	491	315, 255, 151	355, 265sh	MS				✓
	98	flavonol	Isorhamnetin-3-O-rutinoside	Narcissin	C28H32O16	624.548	623	315, 300, 468	354, 256	MS				✓																				1.12
		stilbenoid	trans-Pterostilbene	trans-3',5'-Dimethoxy-resveratrol	C16H16O3	256.301	255	239, 197, 209, 226, 165	298, 305sh, 275	DAD
	99	flavonol	Isorhamnetin-3-(6-O-feruloyl)glucoside		C32H30O15	654.577	653	315	320, 274	MS
	100	flavonol	Isorhamnetin-3-(4-O-rhamnosyl)rutinoside	Isorhamnetin diglycoside	C34H42O20	770.685	769	461, 623, 163	354, 256	MS, DAD				✓																	✓	✓						✓
		stilbenoid	trans-ϵ-Viniferin		C28H22O6	454.478	453	359, 435, 347, 369, 411, 333, 253, 225	327, 285sh, 308sh	MS, NMR, DAD																								✓	✓												0.32224	0.40704
	101	flavonol	Kaempferol-3-(6-O-coumaroyl)glucoside	Tiliroside	C30H26O13	594.525	593	285, 227, 255	317, 265, 356sh, 310sh	MS									✓
	102	flavonol	Kaempferol-3 (7-O-glucosyl)galactoside	Kaempferol-3,7-Diglucoside	C27H30O16	610.521	609	447, 489, 285	343, 300sh, 265	DAD																												✓
		stilbenoid	trans-Isorhapontin		C21H24O9	420.414	419	257, 225, 241, 242, 201, 175, 159, 181, 132	326, 303, 290	MS																								0.24	✓
		hydroquinone	Arbutin	p-Hydroxyphenyl-D-glucopyranoside	C12H16O7	272.253	271	107, 159, 71	281, 232	MS																								2.39
		stilbenoid	cis-ϵ-Viniferin		C28H22O6	454.478	453	359, 435, 347, 369, 411, 333, 253, 225	286, 201, 230sh	MS																									✓
	103	flavanone	Naringenin	4',5,7-Trihydroxyflavanone	C15H12O5	272.256	271	151, 177, 119, 165, 125, 107, 227, 191	289, 228, 336sh	MS																									✓
	104	flavanone	Naringenin-7-O-glucoside	Prunin	C21H22O10	434.397	433	271, 269, 313, 177, 151, 119, 107	282, 222	MS																									✓
	105	flavonol (biflavonoid)	Diquercetin-3-(3-O-glucosyl)glucuronide		C42H36O24	924.722	923	765, 755, 837, 903, 935, 808	374	MS																										✓
[truncated: 27 more columns]

## Sheet: Table S2 Stilbenic compounds
											Reference	46	47		48		49		50		51		52	53	13	54		55		12		8		41		9		56	57		58	59		60		61		56	64
	A Reference List of Phenolic Compounds (Including Stilbenes) in Grapevine (Vitis vinifera L.) Roots, Woods, Canes, Stems, and Leaves										Citation	Jean-Denis JB, Pezet R, Tabacchi R. 2006. Rapid analysis of stilbenes and derivatives from downy mildew-infected grapevine leaves by liquid chromatography–atmospheric pressure photoionisation mass spectrometry. Journal of Chromatography A, 1112, 263–268.	Vrhovsek U, Malacarne G, Masuero D, Zulini I, Guella G, Stefanini M, Velasco R, Mattivi F. 2012. Profiling and accurate quantification of trans-resveratrol, trans-piceid, trans-pterostilbene and 11 viniferins induced by Plasmopara viticola in partially resistant grapevine leaves. Australian Journal of Grape and Wine Research 18, 11–19.		Mattivi F, Vrhovsek U, Malacarne G, Masuero D, Zulini L, Stefanini M, Moser C, Velasco R, Guella G. 2011. Profiling of resveratrol oligomers, important stress metabolites, accumulating in the leaves of hybrid Vitis vinifera (Merzling ×Teroldego) genotypes infected with Plasmopara viticola. Journal of Agricultural and Food Chemistry 59, 5364–5375.		Pezet R, Perret C, Jean-Denis JB, Tabacchi R, Gindro K, Viret O. 2003. δ-Viniferin, a resveratrol dehydrodimer: one of the major stilbenes synthesized by stressed grapevine leaves. Journal of Agricultural and Food Chemistry 51, 5488-5492.		Choi S-J. 2011. The Identification of stilbene compounds and the change of their contents in UV-irradiated grapevine leaves. Korean Journal of Horticultural Science & Technology 29, 374–381.		Schnee S, Viret O,Gindro K. 2008. Role of stilbenes in the resistance of grapevine to powdery mildew. Physiological and Molecular Plant Pathology 72, 128–133.		Tříska J, Vrchotová N, Olejníčková J, Jílek R, Sotolář R. 2012. Separation and identification of highly fluorescent compounds derived from trans-resveratrol in the leaves of Vitis vinifera infected by Plasmopara viticola. Molecules 17, 2773–2783.	Becker L, Carré V, Poutaraud A, Merdinoglu D, Chaimbault P. 2014. MALDI mass spectrometry imaging for the simultaneous location of resveratrol, pterostilbene and viniferins on grapevine leaves. Molecules 19, 10587–10600.	Vezzulli S, Malacarne G, Masuero D, Vecchione A, Dolzani C, Goremykin V, Mehari HZ, Banchi E, Velasco R, Stefanini M, Vrhovsek U, Zulini L, Franceschi P, Moser C. 2019. The Rpv3-3 haplotype and stilbenoid induction mediate downy mildew resistance in a grapevine interspecific population. Frontiers in Plant Science 10, 234.	Bruisson S, Maillot P, Schellenbaum P, Walter B,Gindro K, Deglène-Benbrahim L. 2016. Arbuscular mycorrhizal symbiosis stimulates key genes of the phenylpropanoid biosynthesis and stilbenoid production in grapevine leaves in response to downy mildew and grey mould infection. Phytochemistry 131, 92–99.		van Leeuwen C, Roby J-P, Alonso-Villaverde V, Gindro K. 2013. Impact of clonal variability in vitis vinifera cabernet franc on grape composition, wine quality, leaf blade stilbene content, and downy mildew resistance. Journal of Agricultural and Food Chemistry 61, 19−24.		Chitarrini G, Zulini L, Masuero D, Vrhovsek U. 2017. Lipid, phenol and carotenoid changes in ‘Bianca’ grapevine leaves after mechanical wounding: a case study. Protoplasma, 254, 2095–2106.		Schoedl K. Forneck A. Sulyok M. Schuhmacher R. 2011. Optimization. in-house validation. and application of a Liquid Chromatography_Tandem Mass Spectrometry (LC_MS/MS)-based method for the quantification of selected polyphenolic compounds in leaves of grapevine (Vitis vinifera L.). Journal of Agricultural and Food Chemistry 59. 10787–10794.		Griesser M. Weingart G. Schoedl-Hummel K. Neumann N. Becker M. Varmuza K. Liebner F. Schuhmacher R. Forneck A. 2015. Severe drought stress is affecting selected primary metabolites. polyphenols. and volatile metabolites in grapevine leaves (Vitis vinifera cv. Pinot noir) Plant Physiology and Biochemistry 88. 17–26.		Schoedl K. Schuhmacher R. Forneck A. 2012. Studying the polyphenols of grapevine leaves according to age and insertion level under controlled conditions. Scientia Horticulturae 141. 37–41.		Wei, Y-J, Zhao S-R, Li J-M, Xue B. 2016. Stilbene profiles in different tissues of Vitis vinifera L. cv. Cabernet Sauvignon and a comparison of their antioxidant activity Australian Journal of Grape and Wine Research 22, 226–231.	Martin N, Vesentini D, Rego C, Monteiro S,Oliveira H, Ferreira BR. 2009. Phaeomoniella chlamydospora infection induces changes in phenolic compounds content in Vitis vinifera. Phytopathologia Mediterranea 48, 101–116.		Gabaston J, Cantos-Villar E, Biais B, Waffo-Teguo P, Renouf E, Corio-Costet M-F, Richard T, Mérillon J-M. 2017. Stilbenes from Vitis vinifera L. waste: A sustainable tool for controlling Plasmopara Viticola. Journal of Agricultural and Food Chemistry 65, 2711−2718.	Amalfitano C, Agrelli D, Arrigo A, Mugnai L, Surico G, Evidente A. 2011. Stilbene polyphenols in the brown red wood of Vitis vinifera cv. Sangiovese affected by "esca proper". Phytopathologia Mediterranea 50, S224−S235.		Rusjan D, Persic M, Likar M, Biniari K, Mikulic-Petkovsek M. 2017. Phenolic responses to esca-associated fungi in differently decayed grapevine woods from different trunk parts of ‘Cabernet Sauvignon’. Journal of Agricultural and Food Chemistry 65, 6615−6624.		Lambert C, Bisson J, Waffo-Téguo P, Papastamoulis Y, Richard T, Corio-Costet M-F, Mérillon J-M, Cluzet S. 2012. Phenolics and their antifungal role in grapevine wood decay: focus on the Botryosphaeriaceae family. Journal of Agricultural and Food Chemistry 60, 11859−11868.		Wei, Y-J, Zhao S-R, Li J-M, Xue B. 2016. Stilbene profiles in different tissues of Vitis vinifera L. cv. Cabernet Sauvignon and a comparison of their antioxidant activity Australian Journal of Grape and Wine Research 22, 226–231.	Papastamoulis Y, Richard T, Nassra M, Badoc A, Krisa S, Harakat D, Monti J-P, Mérillon J-M, Waffo-Téguo. 2014. Viniphenol A, a complex resveratrol hexamer from vitis vinifera stalks: structural elucidation and protective effects against amyloid-β-induced toxicity in PC12 cells. Journal of Natural Products 77, 213–217.
	Piebiep Goufo, Rupesh K. Singh and Isabel Cortez
											Plant part (leaves, stems, canes, trunk, roots)	LEAVES (no control)	LEAVES		LEAVES		LEAVES		LEAVES		LEAVES		LEAVES	LEAVES	LEAVES	LEAVES		LEAVES		LEAVES		LEAVES		LEAVES		LEAVES		LEAVES	WOODS		WOODS	WOODS		WOODS		WOODS		STEMS	STEMS
											Biotic and/or abiotic stresses studied	downy mildew, uv-irradiation	downy mildew		downy mildew		downy mildew, uv-irradiation		uv-irradiation		powdery mildew		downy mildew, uv-irradiation	downy mildew, uv-irradiation	downy mildew	downy mildew and grey mould		downy mildew and grey mould		mechanical wounding									esca (Phaeomoniella chlamydospora)		downy mildew	esca		esca		Grapevine trunk diseases (Diplodia seriata or Neofusicoccum parvum)
											Unit (DW=dry weight, FW=fresh weight)	Not applicable	mg/kg FW		mg/kg FW		mg/kg FW		mg/kg FW		mg/kg FW		Not applicable	Not applicable	Not applicable	mg/kg FW		mg/kg FW		mg/kg FW		mg/kg FW		mg/kg FW		mg/kg FW		mg/kg DW	mg/kg DW		mg/kg DW	mg/kg FW		mg/kg FW (changed from μg/kg FW)		mg/kg FW		mg/kg DW	Not applicable
											Detection	LC-MS	LC-MS, NMR		LC-MS, NMR		LC-MS		LC-MS		LC-MS		LC-MS	LC-MS	LC-MS	DAD		DAD		LC-MS		LC-MS		LC-MS		LC-MS		LC-MS	LC-MS		LC-MS	LC-MS, NMR		LC-MS		LC-MS		LC-MS	LC/MS, NMR
											Levels (minimum, maximum, average values)		minimun value	maximum value	minimun value	maximum value	minimun value	maximum value	minimun value	maximum value	minimun value	maximum value				minimun value	maximum value	minimun value	maximum value	minimun value	maximum value	minimun value	maximum value	minimun value	maximum value	minimun value	maximum value		minimun value	maximum value	58	minimun value	maximum value	minimun value	maximum value	minimun value	maximum value
	Compound ID	Compound group	Compound name	Other reported names	Chemical formula	Molecular weight (g/mol)	[M − H] − (m/z)	MS-MS -	UV spectrum pattern (MeOH)	Detection mode
							[M–H]– Precursor Ion	Main HR-MS/MS Fragments (m/z)	λmax CH3OH (nm)
				NA = not available
	106	Monomers	trans-Astringin	Piceatannol-3-O-glucoside	C20H22O9	406.383	405	243, 225, 201, 322, 159, 199, 173	331, 305	MS									4.1	7.6					✓					0.04	0.34													2.56	24
	107	Monomers	trans-Resveratroloside	Resveratrol-4-O-glucoside	C20H22O8	390.388	389	227, 185, 179, 269, 143, 305, 371, 209	311	MS									7.5	21.8
	108	Monomers	trans-Resveratrol-2-C-glucoside		NA	NA	389	269, 241, 299, 175, 163	326	MS, NMR
	109	Monomers	trans-Resveratrol-10-C-glucoside		NA	NA	435	389, 227	315	MS, NMR
	110	Monomers	trans-Resveratrol-O-glucoside		C20H22O8	390.388	389	227, 305, 175, 185	321	MS, NMR																																		131	1090
	111	Dimers	Leachianol G	Oxidized resveratrol dimer	C28H24O7	472.496	471	387, 377, 349, 255, 121	280, 218	MS, NMR																																350.32	2800.34						✓
	112	Dimers	Leachianol F	Oxidized resveratrol dimer	C28H24O7	472.496	471	349, 453, 255, 287, 153, 241, 121	280, 218	MS, NMR																																35.57	2805.13						✓
	113	Monomers	trans-Piceid		C20H22O8	390.383	389	227, 185, 251, 269, 209, 371, 143	318, 306, 229	MS, NMR, DAD		✓	0	8.8	0	8.8	0	64.93	39.6	196.1	2.14	30.48	✓	✓	✓	30.12	170.23	30.12	170.23	0.74	4.69							3.09								35	50	14.52	✓
	114	Dimers	Restrytisol A	Oxidized resveratrol dimer	C28H24O7	472.486	471	377, 255, 349, 121, 471	280, 221	MS		✓
	115	Dimers	Ampelopsin A	Resveratrol dimer	C28H22O7	470.479	469	345, 451, 375, 363, 257, 357, 423, 317, 241	283	MS, NMR																															3684.01	120.86	2705.96			64	151		✓
	116	Dimers	Pallidol		C28H22O6	454.478	453	359, 265, 435, 406, 391, 346, 273	284	MS, NMR			0	26.71	0	26.71									✓					0	15.69										1929.34	410.6	2602.15						✓
	117	Monomers	cis-Astringin		C20H22O9	406.383	405	243, 225, 201, 322, 405, 159, 228, 157	324, 260	MS									0.2	2.1
	118	Dimers	Caraphenol B		C28H22O7	470.473	469	451, 281, 363, 375, 227, 423	326, 291	MS
	119	Monomers	trans-Piceatannol		C14H12O4	244.246	243	175, 225, 149, 215, 201, 159, 181, 132, 199, 143	325, 290, 306	MS, NMR									2	232.1					✓													0.03			378.07					38	66	1.17	✓
	120	Monomers	cis-Resveratroloside		C20H22O8	390.388	389	227, 371, 209	280	MS									15.2	37.5
	121	Monomers	cis-Piceid		C20H22O8	390.383	389	227, 269, 241, 185, 209, 371, 143	284, 230	MS, NMR		✓					0	12.85	79.8	368.4			✓	✓	✓					2.43	6.78
	122	Monomers	trans-Isorhapontin		C21H24O9	420.411	419	257, 241, 225, 175, 242, 201, 159, 281, 132	326, 303, 290	MS									3.7	21.3					✓					0.07	0.68
	123	Monomers	trans-Resveratrol		C14H12O3	228.247	227	185, 143, 183, 159, 157, 212, 205	306, 319, 228	MS, NMR, DAD		✓	0.2	21.1	0.2	21.1	0.28	337.53	4.5	1886.8	0.34	4.17	✓	✓	✓	2.09	30.44	2.09	30.44	0.55	1.86							0.21	15.11	120.45	726.23	783.65	3604.04			69	104	26.05	✓
	124	Monomers	2,4,6-Trihydroxyphenanthrene-2-O-glucoside		C20H20O8	388.372	389	371, 353, 335, 227, 209, 199	261, 222	MS													✓
	125	Trimers	Ampelopsin B	Resveratrol trimer	C28H22O6	454.478	453	359, 243, 211, 183, 265	281, 328	MS, NMR		✓																														0	493.44
	126	Monomers	trans-Isorhapontigenin		C15H14O4	258.27	257	242, 241, 224, 172, 213, 185	325, 303, 290	MS									0.1	9.6
	127	Dimers	trans-Pinostilbene-4’-O-glucoside	trans-Pinostilbene-3-O-glucoside	C21H24O8	404.41	403	241, 226, 225	NA	MS									0.1	3.3
	128	Monomers	cis-Resveratrol		C14H12O3	228.247	227	185, 159, 143, 157, 212 , 143	285, 232	MS, NMR							0	6.45	18.3	53.1			✓		✓																	780.58	3609.66
	129	Tetramers	Hopeaphenol	Resveratrol tetramer	C56H42O12	906.925	905	811, 717, 451, 611, 359, 299	283, 226	MS, NMR																													20.09	80.86	2664.9	184.32	5006.77			1147	1887		✓
	130	Dimers	Ampelopsin D	Resveratrol dimer	C28H22O6	454.478	453	359, 361, 437, 215, 343, 199, 255, 289	314, 280	MS, NMR		✓	0	67.6	0	67.6									✓					0	1.48								10.51	310.22
	131	Dimers	Quadrangularin A	Resveratrol dimer	C28H22O6	454.471	453	359, 289, 411, 435, 347, 253	314	MS, NMR		✓	0	33.8	0	33.8									✓					0	0.15																		✓
	132	Dimers	(+)-cis-ε-Viniferin	(-)-cis-ε-Viniferin	C28H22O6	454.471	453	435, 347, 411, 333, 359, 369, 253	286, 201, 230	MS, NMR		✓	0		0		0	7.31						✓	✓																	2504.08	14023.6
	133	Tetramers	Isohopeaphenol	Resveratrol tetramer	C56H42O12	906.925	905	451, 675, 811, 717, 358, 265	284	MS, NMR			0	131.17	0	131.17									✓					0	28.48								11.68	230.4	7913	1504.33	3275.43			876	3197		✓
	134	Dimers	(+)-trans-ε-Viniferin	(-)-trans-ε-Viniferin	C28H22O6	454.471	453	359, 435, 347, 369, 411, 333, 253, 225	327, 285, 308	MS, NMR, DAD		✓	0	98.2	0	98.2	0	86.81			1.92	19.93		✓	✓	1.34	25.13	1.34	25.13	0	10.52							8.13	122.57	462.76	7939.34	2501.22	14080.9			649	1208	1400.67	✓
	135	Dimers	Viniferifuran	Amurensin H	C28H20O6	452.455	451	NA	317, 289, 209	MS, NMR
	136	Dimers	Diptoindonesin A	ε-Viniferin-C-glucoside	C34H32O11	616.61	615	453, 359, 411, 347, 585	326, 226	MS, NMR																																		9.78	57.7				✓
	137	Tetramers	Ampelopsin H		C56H42O12	906.925	905	811, 717, 705, 793	281	MS, NMR			0	226.8	0	226.8									✓					0	2.86											1144.77	2518.08						✓
	138	Tetramers	Vaticanol C-like isomer	Vaticanol C	C56H42O12	906.929	905	811, 717, 793, 705, 611	281	MS, NMR			0	226.8	0	226.8									✓					0	127.51
	139	Trimers	trans-Miyabenol C (E and Z)	Resveratrol trimer	C42H32O9	680.698	679	661, 573, 479, 451, 637, 585, 447	322, 279	MS, NMR			0	121.3	0	121.3									✓					0	6.83										1339.51	0	121.59			202	487		✓
	140	Trimers	cis-Miyabenol C (E)	Resveratrol trimer	C42H32O9	680.699	679	661, 573, 479, 451, 637, 585, 447	285	MS, NMR			0	148.6	0	148.6									✓					0	6.81
	141	Dimers	trans-ω-Viniferin	Resveratrol dimer	C28H22O6	454.478	453	435, 359, 347, 411, 395, 333, 285	324, 280	MS, NMR		✓	0	63.55	0	63.55									✓					0	1.01										1554.16
	142	Trimers	Davidiol A	Resveratrol trimer	C42H32O9	680.704	679	585, 447, 491, 385, 479, 465, 567	284, 219	MS		✓																																					✓
	143	Trimers	α-Viniferin		C42H30O9	678.682	677	571, 583, 437, 449, 463, 501, 331	284, 309	MS, NMR		✓	0	120.3	0	120.3														0	189.06											0	4732.06
	144	Dimers	cis-ω-Viniferin	Resveratrol dimer	C28H22O6	454.478	453	435, 411, 395, 333, 285, 359, 225	294	MS. NMR		✓	0	63.55	0	63.55									✓					0	0.31
	145	Monomers	trans-Pterostilbene		C16H16O3	256.296	255	239, 197, 209, 226, 165	298, 305, 275	MS, NMR, DAD		✓	0	6	0	6	0	5.14					✓	✓	✓	0.2	10.83	0.2	10.83																				✓
	146	Monomers	cis-Pterostilbene		C16H16O3	256.296	255	197, 239, 209, 226, 165	279	MS		✓
	147	Tetramers	Vitisin A (r2-viniferin)		C56H42O12	906.92	905	811, 887, 717, 693, 545, 451, 359, 265	328, 285	MS, NMR																															1298.67
	148	Tetramers	Vitisifuran A		C56H40O12	904.907	903	NA	322, 232	MS, NMR
	149	Dimers	trans-δ-viniferin		C28H22O6	454.478	453	435, 369, 411, 347, 333, 359, 225, 409	312, 225	MS, DAD		✓					2.04	165.71			0.61	11.38		✓	✓	1.09	51.22	1.09	51.22																			4.86
	150	Tetramers	Vitisin B (r-viniferin)	Resveratrol tetramer	C56H42O12	906.92	905	799, 887, 811, 717, 545, 451, 359, 317	321, 286	MS, NMR																															569.176								✓
	151	Tetramers	Vitisifuran B		C56H40O12	904.907	903	NA	324, 228	MS, NMR
	152	Dimers	cis-δ-viniferin		C28H22O6	454.478	453	435, 411, 369, 359, 333, 347, 317, 307, 251, 267	285, 232	MS							0	3.42						✓
	153	Monomers	cis-Isorhapontigenin		C15H14O4	258.27	257	241, 213, 185, 224	318, 220	MS									0.1	13
	154	Monomers	trans-Rhaponticin	trans-Rhapontin	C21H24O9	420.414	419	257, 241, 281, 299, 323, 405, 389, 243, 169, 395	324, 220	MS									0.1	1.8
	155	Monomers	trans-Pinostilbene		C15H14O3	242.27	241	181, 225, 197, 169	NA	MS									0.1	2
	156	Monomers	cis-Pinostilbene		C15H14O3	242.27	241	181, 225, 197, 169	NA	MS									0.1	0.3
	157	Dimers	trans-ε-Viniferin derivative (dimethylated)		C30H26O6	482.523	481	387, 375, 226, 197, 466	325	MS		✓
	158	Dimers	trans-δ-viniferin derivative (dimethylated)		C30H26O6	482.523	481	397, 361, 439, 387, 463	313	MS		✓
	159	Dimers	trans-Scirpusin A	Resveratrol dimer	C28H22O7	470.47	469	375, 451, 385, 359, 241, 427, 728, 445, 287, 514, 955	320, 286, 204	MS, NMR																																							✓
	160	Tetramers	Vitisin C		C56H42O12	906.926	905	NA	NA	MS, NMR																																							✓
	161	Trimers	Ampelopsin C		C42H32O9	680.709	679	NA	283	MS, NMR																																							✓
	162	Dimers	Maackin A		C28H22O8	486.47	485	244, 226, 137	327, 288, 204	MS, NMR																																							✓
	163	Hexamer	Viniphenol A		C84H64O18	1361.39	1360	NA	NA	MS, NMR																																							✓
	164	Dimers	trans-ε-Viniferin derivative (γ-lactam ring)		C32H26O7N	936.55	536	NA	NA	MS, NMR
	165	Dimers	trans-Resveratrol derivative (γ-lactam ring)		C18H16O4N	310.324	310	NA	NA	MS, NMR
	166	Tetramers	Viniferol A		C56H42O12	906.925	905	559, 813, 361, 453, 651, 541, 801, 783	284, 227	MS, NMR
	167	Tetramers	Viniferol B		C56H42O12	906.929	905	559, 813, 361, 453, 651, 541, 801, 783	283, 225	MS, NMR
	168	Tetramers	Viniferol C		C56H42O12	906.929	905	NA	284, 228	MS, NMR
	169	Trimers	Viniferol D		C42H32O9	680.702	679	NA	NA	MS, NMR
	170	Tetramers	Viniferol E		C56H44O13	924.94	923	NA	284, 231	MS, NMR
	171	Dimers	Malibatol A		C28H20O7	468.454	467	NA	NA	MS, NMR
	172	Dimers	Ampelopsin F		C28H22O6	454.471	453	NA	282, 220	MS, NMR
	173	Trimers	Ampelopsin E		C42H32O9	680.701	679	NA	325, 285	MS, NMR
	174	Tetramers	Wilsonol C		C56H42O12	906.929	905	NA	231	NMR
	175	Tetramers	Heyneanol A		C56H42O12	906.929	905	320, 284	322, 237	NMR
	176	Dimers	Viniferal		C35H26O8	574.579	573	NA	NA	MS, NMR
	177	Dimers	Vitisinol C		C27H24O5	428.482	427	NA	358, 279	MS
	178	Dimers	Vitisinol E		C27H24O6/C29H26O7	444,475/486,51	444/485	NA	281, 230, 204/358, 279, 253	MS, NMR
	179	Dimers	Vitisinol B		C35H26O8	574.579	573	NA	282, 228, 204	MS, NMR
	180	Tetramers	Stenophyllol C	Napalensinol B	C56H42O12	906.923	905	NA	285, 330, 223	MS, NMR
	181	Dimers	Viniferether A		C29H26O7	486.509	485	NA	280, 229	MS, NMR
	182	Dimers	Viniferether B		C29H26O7	486.513	485	NA	280, 231	MS, NMR
	183	Monomers	cis-Resveratrol-3-O-glucoside		C20H23O8	391.391	389	227	319, 306	MS																						3.91	22	3.91	22	0.01	232.63
[truncated: 28 more columns]
